# Supplementary material
Source: PubMed Central journal article supplement (PMC6886359)

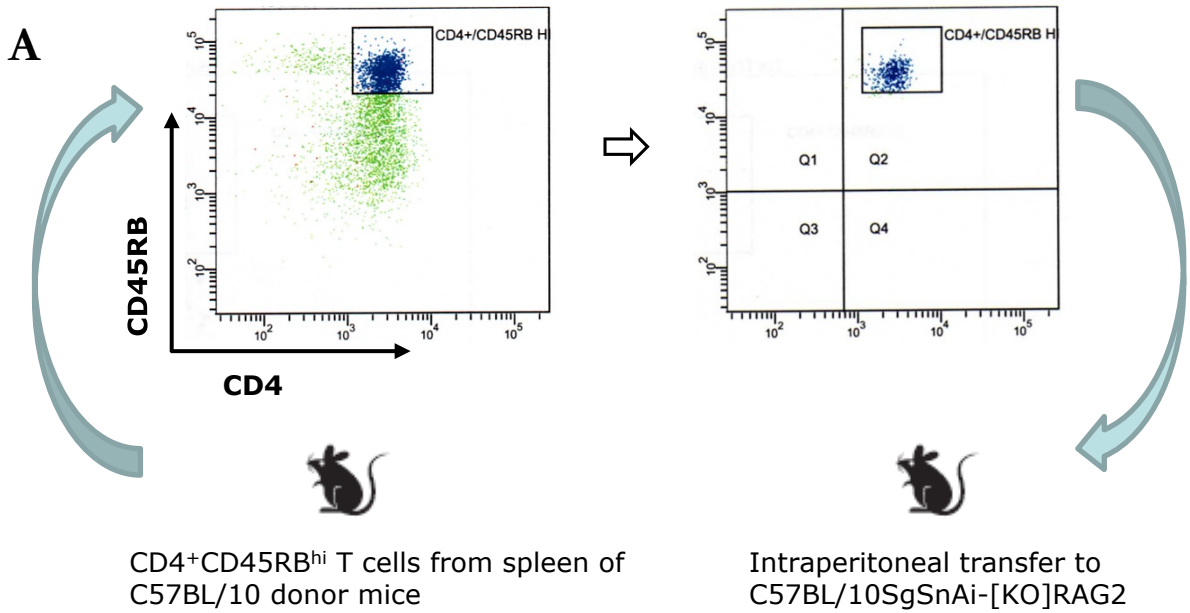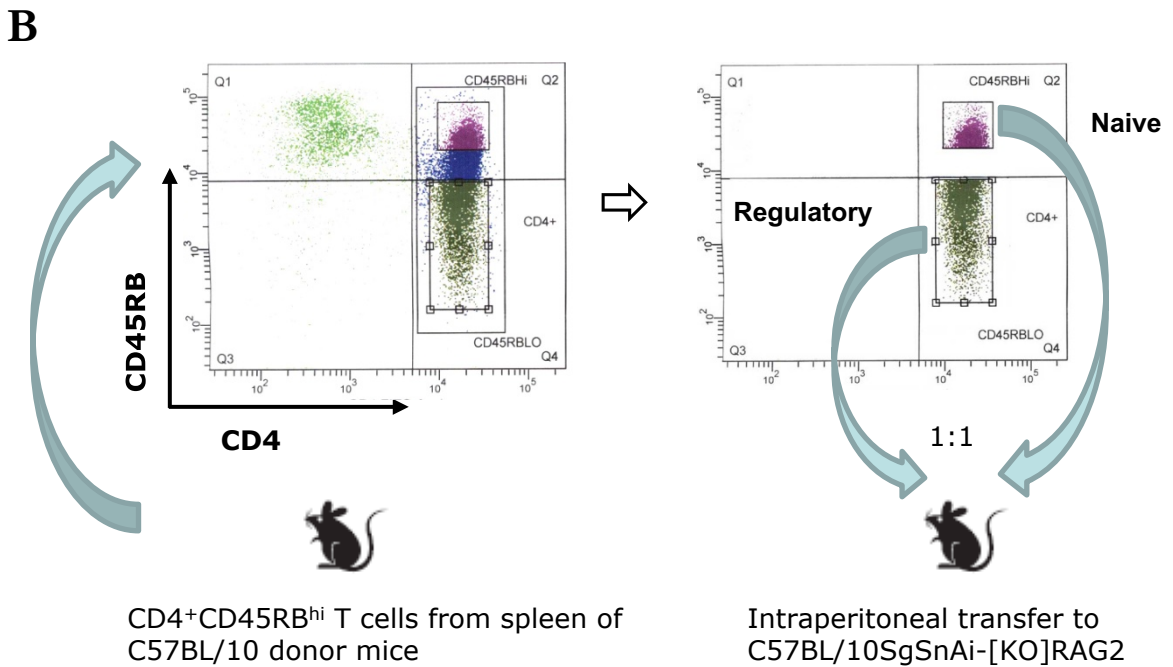

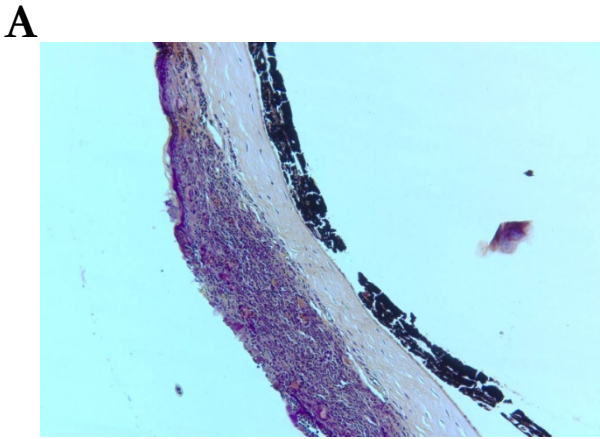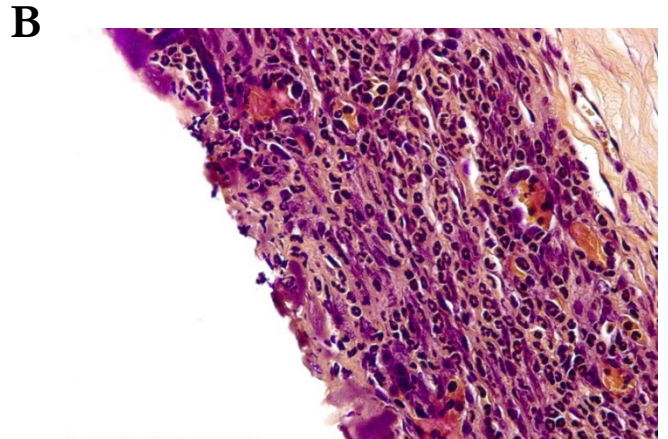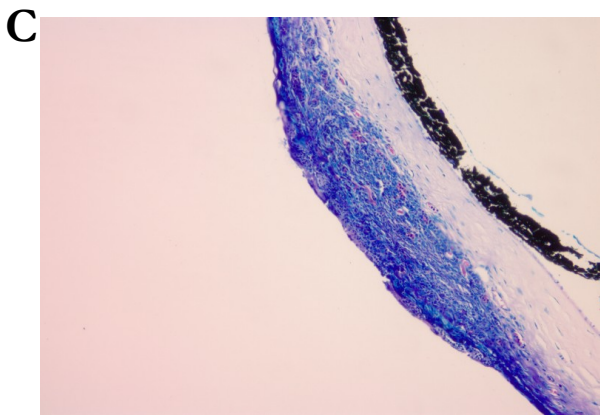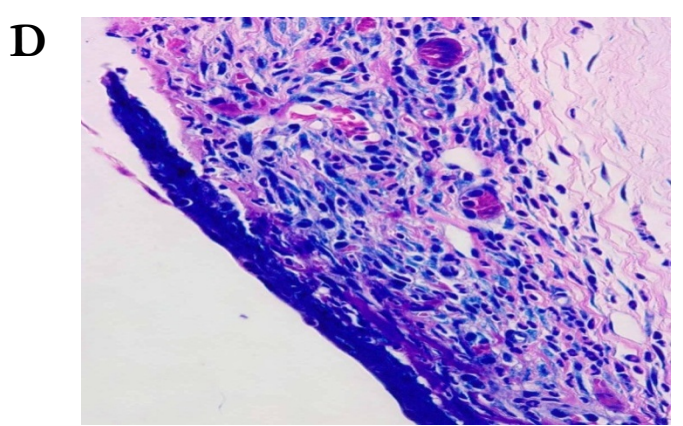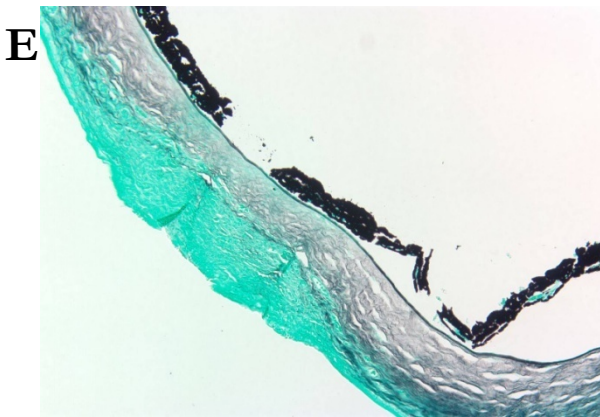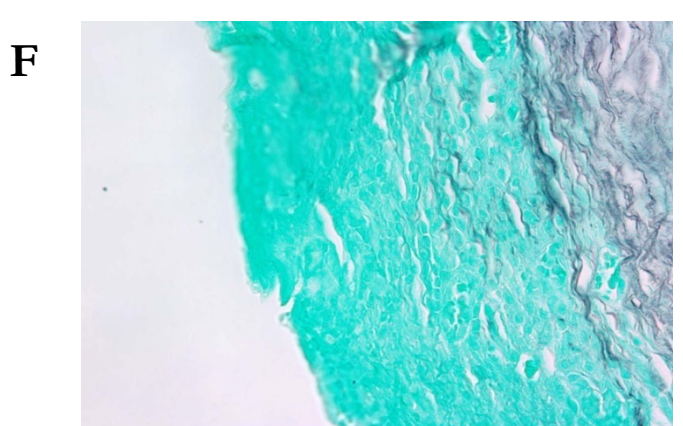

Supplement: NIHMS1046735-supplement-1.pdf [file NIHMS1046735-supplement-1.pdf]
